# Supplementary material for: Printability Study of a Conductive Polyaniline/Acrylic Formulation for 3D Printing
Source: MDPI journal article supplement (doi:10.3390/polym13132068), 2021-06-23
Supplement: s1 [file s1]

Supporting information

# Printability Study of a Conductive Polyaniline/Acrylic Formulation for 3D Printing

Goretti Arias-Ferreiro <sup>1</sup>, Ana Ares-Pernas <sup>1</sup>, Aurora Lasagabáster-Latorre <sup>2</sup>, Nora Aranburu <sup>3</sup>, Gonzalo Guerrica-Echevarria <sup>3</sup>, M. Sonia Dopico-García <sup>1</sup> and María-José Abad <sup>1,\*</sup>

<sup>1</sup> Grupo de Polímeros, Centro de Investigaciones Tecnológicas, Universidade da Coruña, Campus de Ferrol, 15471 Ferrol, Spain; goretti.arias@udc.es (G.A.-F.); ana.ares@udc.es (A.A.-P.); s.dopico@udc.es (M.S.D.-G.)

<sup>2</sup> Dpto Química Orgánica I, Facultad de Óptica y Optometría, Universidad Complutense de Madrid, Arcos de Jalón 118, 28037 Madrid, Spain; aurora@ucm.es

<sup>3</sup> POLYMAT and Department of Advanced Polymers and Materials: Physics, Chemistry and Technology, Faculty of Chemistry, University of the Basque Country UPV/EHU, 20018 Donostia-San Sebastián, Spain; nora.aramburu@ehu.eus (N.A.); gonzalo.gerrika@ehu.eus (G.G.-E.)

\* Correspondence: mjabad@udc.es

## S1. Results

### S1.1. Rheology

Viscosities of the liquid formulations are shown in Figure S1 and Figure S2.

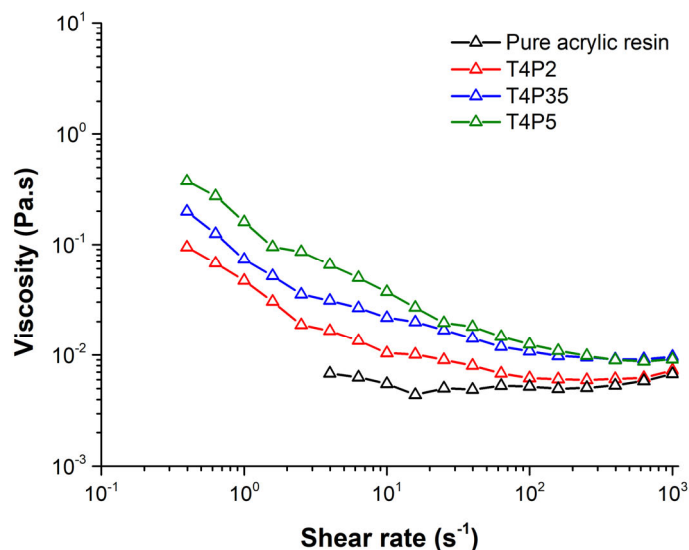

**Figure S1.** Viscosity values as a function of shear rate and PANI content at room temperature for a constant TPO initiator content of 4 wt%.

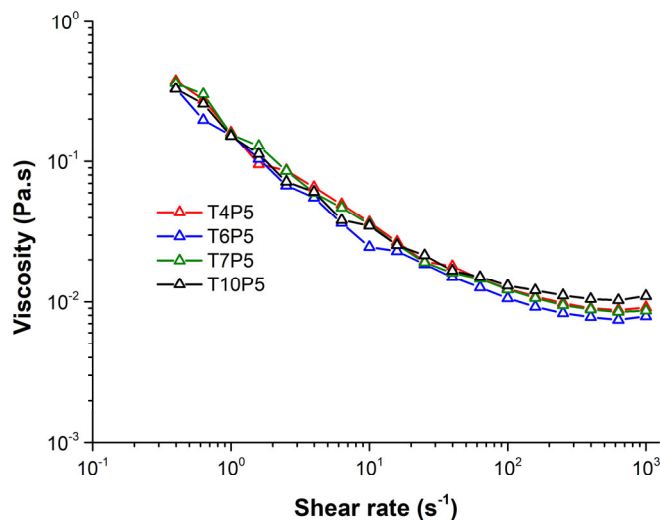

**Figure S2.** Viscosity values as a function of shear rate and TPO content at room temperature for a constant PANI content of 5 wt%.

### S1.2. UV-Visible Spectra of PANI-HCl

Figure S3 shows that the UV-Vis an absorbance spectrum of PANI-HCl dispersed in EGPEA:15 wt% HDODA at a concentration of 60 ppm. The characteristic peaks of emeraldine salt form of PANI are detected at 315, 386, 485 (shoulder but distinctive peak in the first derivative spectrum) and  $>800$  nm. The peak at 386 nm can be assigned to  $\pi-\pi^*$  transition of the benzenoid, whereas the peaks at around 485 and above 800 nm can be attributed to the polaron- $\pi^*$  and  $\pi$ -polaron transitions, respectively [1]. The strong absorption around 405 nm (the UV lamp of the 3D printer is a 405 nm model) indicate that PANI will affect the curing process of the acrylate dispersions.

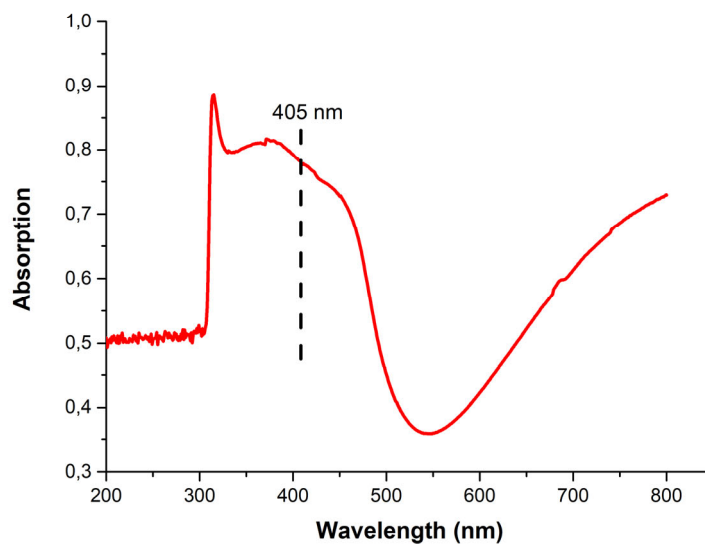

**Figure S3.** UV-visible absorption spectrum of PANI-HCl in EGPEA:15 wt% HDODA at 60 ppm.

### S1.3. Structural Characterization

The smooth surface of the pure acrylic resin and in-house PANI printed composites and the nanorod morphology of pristine PANI-HCl and are shown in Fig. S4 and Fig S5, respectively.

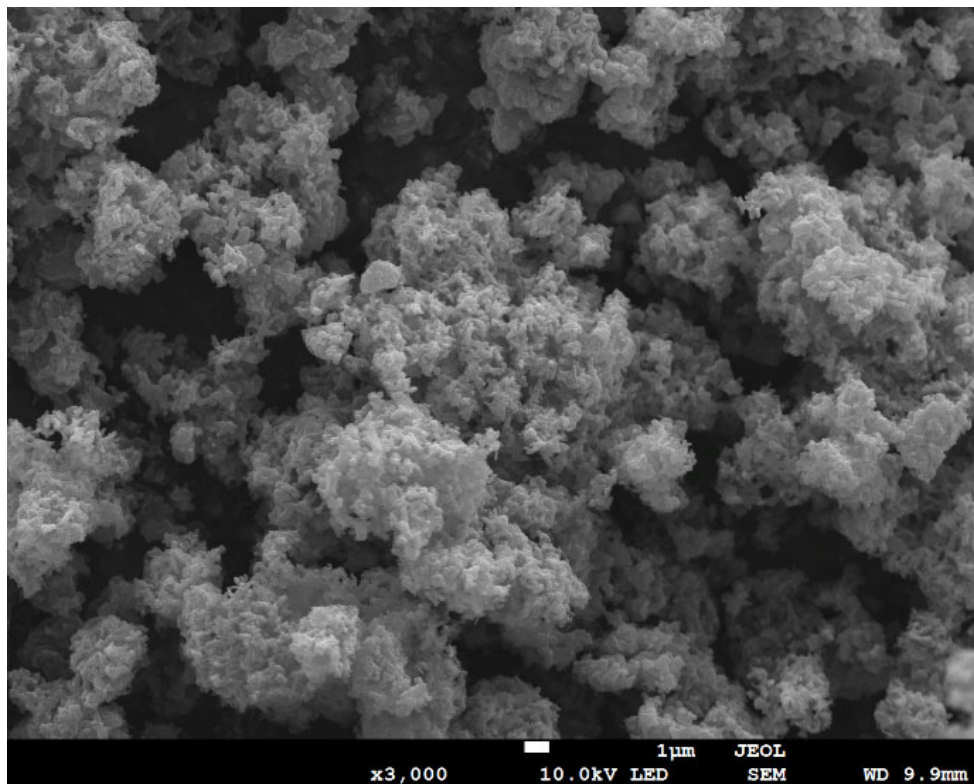

**Figure S4.** SEM image showing the nanorod morphology of PANI-HCl with magnitude amplification 3000x.

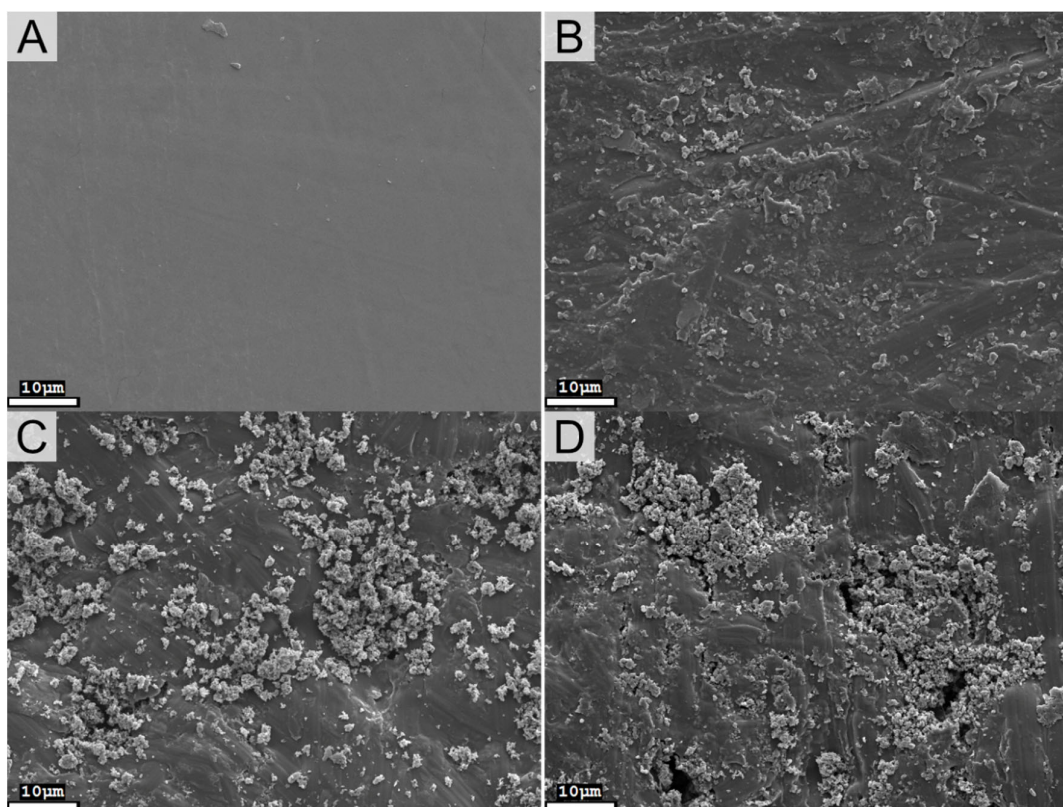

**Figure S5.** SEM images of the surface of printed films (A) Pure acrylic resin, (B) T7P2, (C) T7P35 and (D) T7P5 with magnitude amplification 1500 $\times$ .

#### S1.4. Thermal and Mechanical Properties

**Table S1.** Influence of sample formulation on  $T_g$ , determined by DSC, and mechanical properties of printed samples measured by tensile test ( $E$  = Young's modulus,  $\sigma$  = stress at break and  $\varepsilon$  = elongation at break).

| Sample Formulation | $T_g$ (°C)     | $E$ (MPa)      | $\sigma$ (MPa) | $\varepsilon$ (%) |
|--------------------|----------------|----------------|----------------|-------------------|
| Reference          | $16.1 \pm 1.5$ | $20.1 \pm 1.6$ | $3.5 \pm 1.6$  | $20.1 \pm 1.6$    |
| T4P2               | $13.4 \pm 1.8$ | $18.8 \pm 1.1$ | $3.0 \pm 0.3$  | $17.2 \pm 1.2$    |
| T4P35              | $10.9 \pm 0.5$ | $21.0 \pm 4.4$ | $3.8 \pm 1.5$  | $18.4 \pm 4.9$    |
| T6P2               | $13.4 \pm 1.3$ | $18.5 \pm 1.1$ | $3.1 \pm 0.4$  | $18.3 \pm 1.9$    |
| T6P35              | $9.6 \pm 1.1$  | $21.8 \pm 0.4$ | $4.2 \pm 0.4$  | $20.3 \pm 2.3$    |
| T7P2               | $14.0 \pm 0.0$ | $18.1 \pm 1.6$ | $3.0 \pm 0.3$  | $18.0 \pm 1.2$    |
| T7P35              | $12.7 \pm 0.1$ | $18.9 \pm 1.8$ | $2.3 \pm 0.6$  | $12.2 \pm 2.1$    |
| T7P5               | $12.8 \pm 1.2$ | $21.4 \pm 1.5$ | $3.3 \pm 0.5$  | $15.9 \pm 1.8$    |
| T10P2              | $15.1 \pm 1.1$ | $19.7 \pm 1.0$ | $3.5 \pm 0.3$  | $20.0 \pm 0.8$    |
| T10P35             | $14.2 \pm 1.0$ | $22.3 \pm 2.0$ | $3.9 \pm 0.2$  | $19.5 \pm 0.5$    |
| T10P5              | $14.0 \pm 0.3$ | $22.0 \pm 2.0$ | $3.7 \pm 0.7$  | $17.3 \pm 2.0$    |

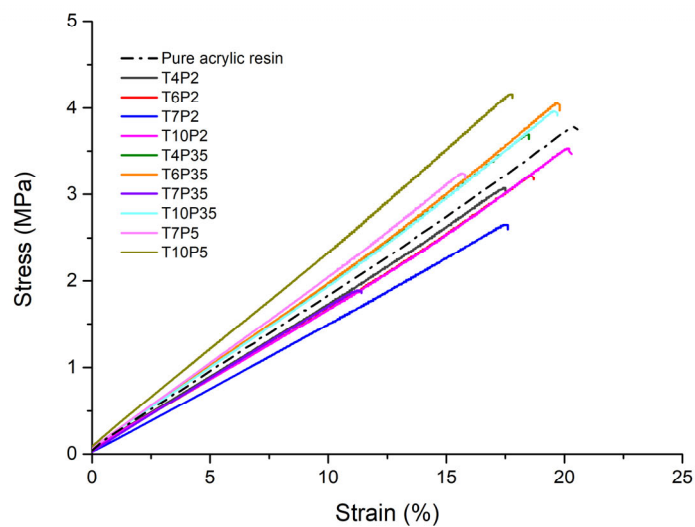

Figure S6. Stress-strain curve of Pani-acrylic composites.

## References

1. Jafarzadeh, S.; Thormann, E.; Rönnevall, T.; Adhikari, A.; Sundell, P.-E.; Pan, J.; Claesson, P.M. Toward Homogeneous Nanostructured Polyaniline/Resin Blends. *ACS Appl. Mater. Interfaces* **2011**, *3*, 1681–1691, doi:10.1021/am2002179.
